# Supplementary material for: Synthesis, optoelectronic properties, and charge carrier dynamics of colloidal quasi-two-dimensional Cs3Bi2I9 perovskite nanosheets
Source: Royal Society of Chemistry journal article supplement (doi:10.1039/d2nr06048e), 2022-12-30
Supplement: d2nr06048e1.pdf [file d2nr06048e1.pdf]

## Synthesis, Optoelectronic Properties, and Charge Carrier Dynamics of Colloidal Quasi-two-dimensional Cs<sub>3</sub>Bi<sub>2</sub>I<sub>9</sub> Perovskite Nanosheets

Sushant Ghimire,<sup>\*a</sup> Chris Rehhausen,<sup>a</sup> Saskia Fiedler,<sup>b</sup> Urvi Parekh,<sup>a</sup> Rostyslav Lesyuk,<sup>a,c</sup> Stefan Lochbrunner,<sup>a</sup>  
Christian Klinke<sup>\*a,d,e</sup>

<sup>a</sup> *Institute of Physics, University of Rostock, Albert-Einstein-Str. 23-24, 18059 Rostock, Germany*

<sup>b</sup> *Center for Nanophotonics, NWO-Institute AMOLF, Science Park 104, 1098 XG Amsterdam, The Netherlands*

<sup>c</sup> *Pidstryhach Institute for Applied Problems of Mechanics and Mathematics of NAS of Ukraine, Naukova str. 3b, 79060 Lviv & Department of Photonics, Lviv Polytechnic National University, Bandery str. 12, 79000 Lviv, Ukraine*

<sup>d</sup> *Department of Chemistry, Swansea University, Swansea SA2 8PP, UK.*

<sup>e</sup> *Department "Life, Light & Matter", University of Rostock, Albert-Einstein-Strasse 25, 18059 Rostock, Germany.*

\*Corresponding authors: [sushant.ghimire@rostock.de](mailto:sushant.ghimire@rostock.de), [christian.klinke@uni-rostock.de](mailto:christian.klinke@uni-rostock.de)

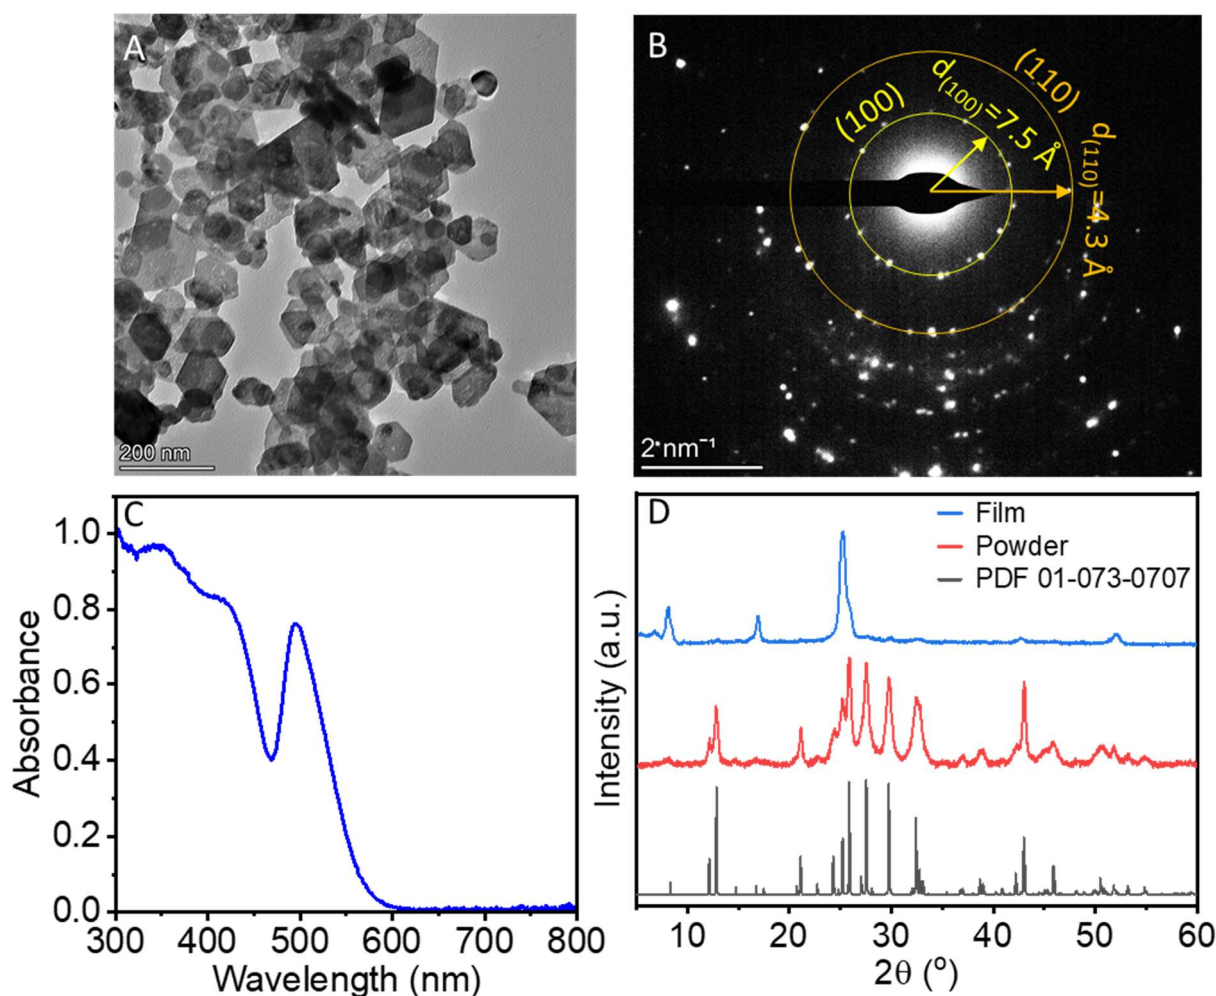

Fig. S1 Characterization of  $\text{Cs}_3\text{Bi}_2\text{I}_9$  precipitates obtained from the hot-injection method. (A) Transmission electron microscope (TEM) image of nanoplates. (B) Selected area electron diffraction (SAED) of the nanoplates showing ring pattern. (C) UV-vis absorption spectrum of the sample dispersed in toluene. (D) X-ray diffraction pattern of the film and powder of the precipitate compared with Powder Diffraction File (PDF) card number 01-073-0707.

The TEM image in Fig. S1 (A) shows the size distribution of small and large nanoplates. The corresponding SAED pattern [Fig. S1 (B)] shows rings, indicating the polycrystalline nature of the sample. We calculated the  $d$ -spacings from the ring patterns in SAED as 7.5 Å and 4.3 Å and assigned the corresponding rings as the diffraction spots from (100) and (110) planes, respectively of a hexagonal crystal structure. The XRD patterns in the film and powder form of  $\text{Cs}_3\text{Bi}_2\text{I}_9$  precipitates are shown in Fig. S1 (D) and compared with the standard XRD patterns obtained from the PDF card number 01-073-0707. Although the  $\text{Cs}_3\text{Bi}_2\text{I}_9$  precipitates show lateral size distribution, their UV-visible absorption spectrum is comparable with that (see Fig. 4A in the main text) of large quasi-2D  $\text{Cs}_3\text{Bi}_2\text{I}_9$  nanosheets obtained from the selective reprecipitation. This is obvious since the confinement of excitons happens within the 0D molecular structure [i.e. the isolated  $(\text{Bi}_2\text{I}_9)^{3-}$  dimers] which is present in  $\text{Cs}_3\text{Bi}_2\text{I}_9$  perovskites irrespective of their lateral size and shape.<sup>1,2</sup>

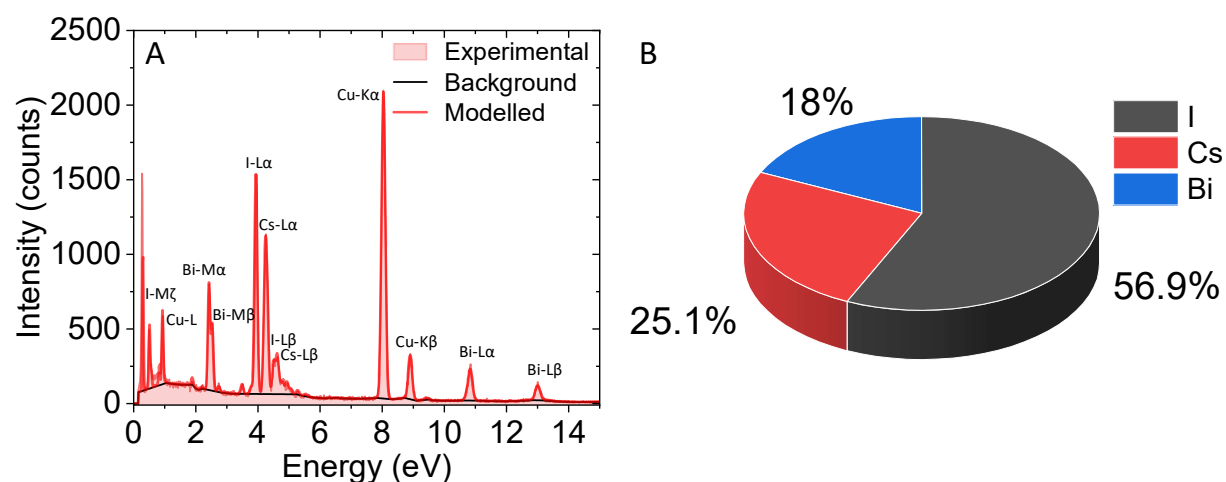

**Fig. S2** (A) Energy dispersive X-ray (EDX) spectrum of a quasi-2D  $\text{Cs}_3\text{Bi}_2\text{I}_9$  nanosheet. (B) Elemental composition with atomic fractions of constituent elements in percentage obtained from the EDX spectrum.

**Table S1:** List of powder XRD peaks and the corresponding d-spacings of  $\text{Cs}_3\text{Bi}_2\text{I}_9$  nanosheets at different  $2\theta$  angles that are assigned to different  $hkl$ . Lattice parameters ( $a=b$ , and  $c$ ) are calculated using  $d_{(100)}$  and  $d_{(006)}$ , respectively.

| $(hkl)$ | $2\theta$ | d-spacing ( $\text{\AA}$ ) | $a$ ( $\text{\AA}$ ) | $b$ ( $\text{\AA}$ ) | $c$ ( $\text{\AA}$ ) |
|---------|-----------|----------------------------|----------------------|----------------------|----------------------|
| 002     | 8.351     | 10.579                     |                      |                      |                      |
| 100     | 12.146    | 7.280                      |                      |                      |                      |
| 101     | 12.831    | 6.890                      |                      |                      |                      |
| 004     | 16.732    | 5.294                      |                      |                      |                      |
| 104     | 20.696    | 4.288                      |                      |                      |                      |
| 110     | 21.094    | 4.208                      |                      |                      |                      |
| 112     | 22.725    | 3.909                      |                      |                      |                      |
| 200     | 24.418    | 3.642                      |                      |                      |                      |
| 006     | 25.201    | 3.531                      |                      |                      |                      |
| 202     | 25.830    | 3.446                      |                      |                      |                      |
| 203     | 27.516    | 3.239                      | 8.40                 | 8.40                 | 21.186               |
| 204     | 29.722    | 3.003                      |                      |                      |                      |
| 205     | 32.366    | 2.764                      |                      |                      |                      |
| 300     | 36.965    | 2.430                      |                      |                      |                      |
| 300     | 37.066    | 2.423                      |                      |                      |                      |
| 0010    | 42.611    | 2.120                      |                      |                      |                      |
| 0010    | 42.717    | 2.115                      |                      |                      |                      |
| 305     | 42.934    | 2.105                      |                      |                      |                      |
| 209     | 45.826    | 1.978                      |                      |                      |                      |
| 0012    | 51.696    | 1.767                      |                      |                      |                      |
| 403     | 51.834    | 1.762                      |                      |                      |                      |

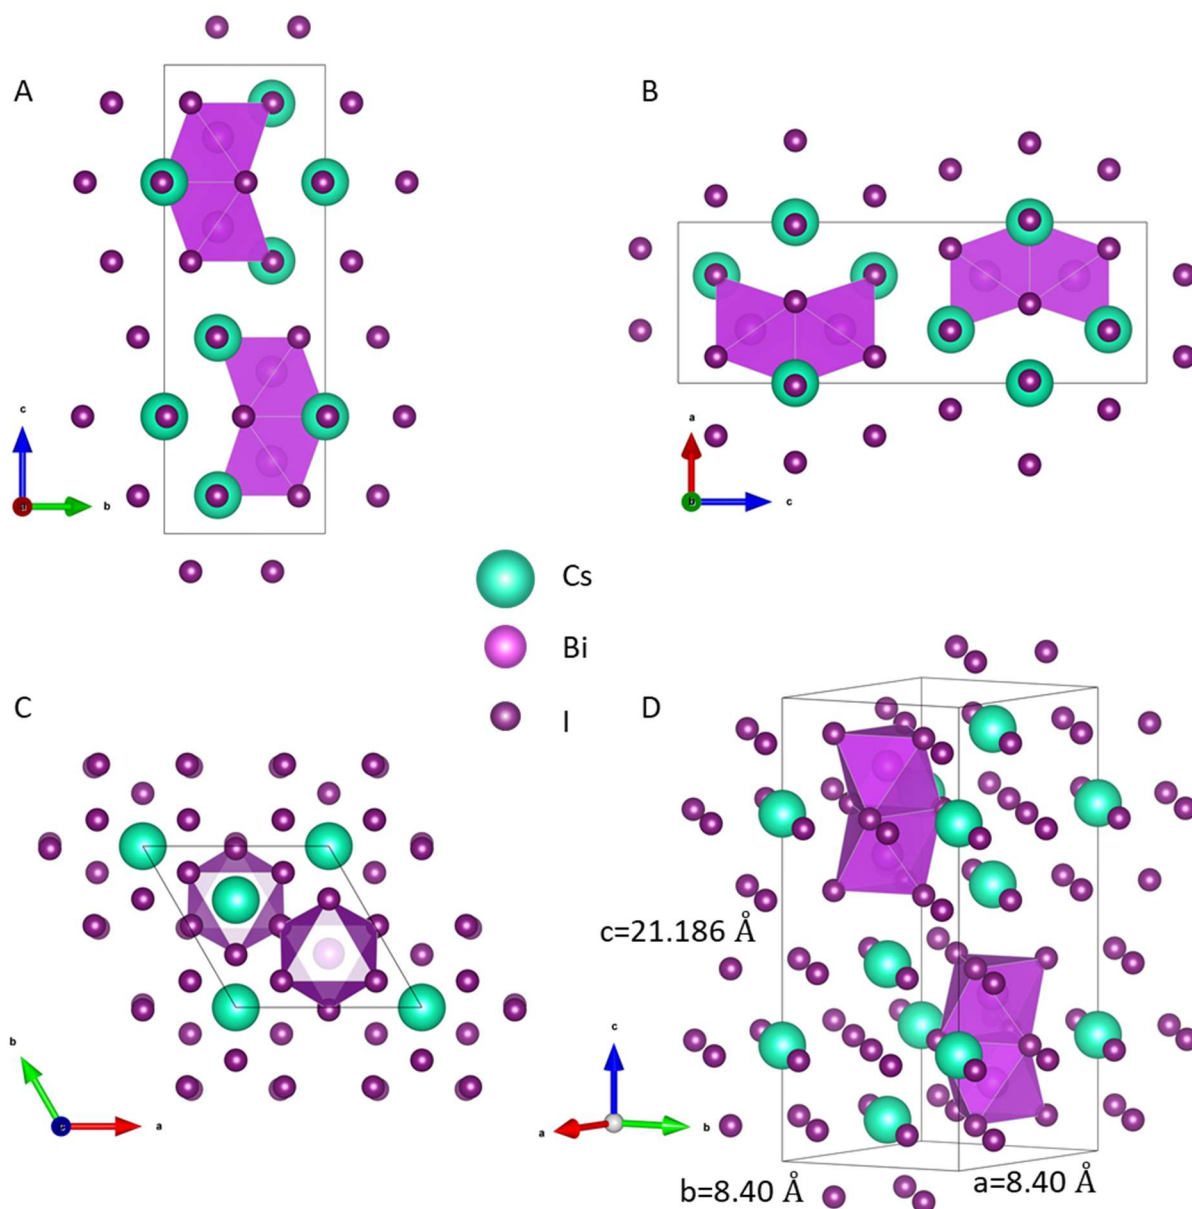

**Fig. S3** Unit cell crystal structure of quasi-2D  $\text{Cs}_3\text{Bi}_2\text{I}_9$  nanosheets at different orientations modeled using the lattice parameter values calculated from the experimental powder XRD data provided in Table S1. The drawings were produced using VESTA software.<sup>3</sup>

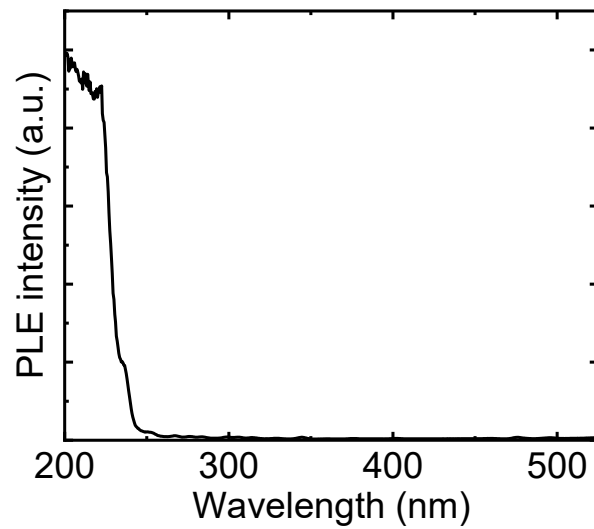

**Fig. S4** Photoluminescence excitation (PLE) spectrum of quasi-2D  $\text{Cs}_3\text{Bi}_2\text{I}_9$  nanosheets.

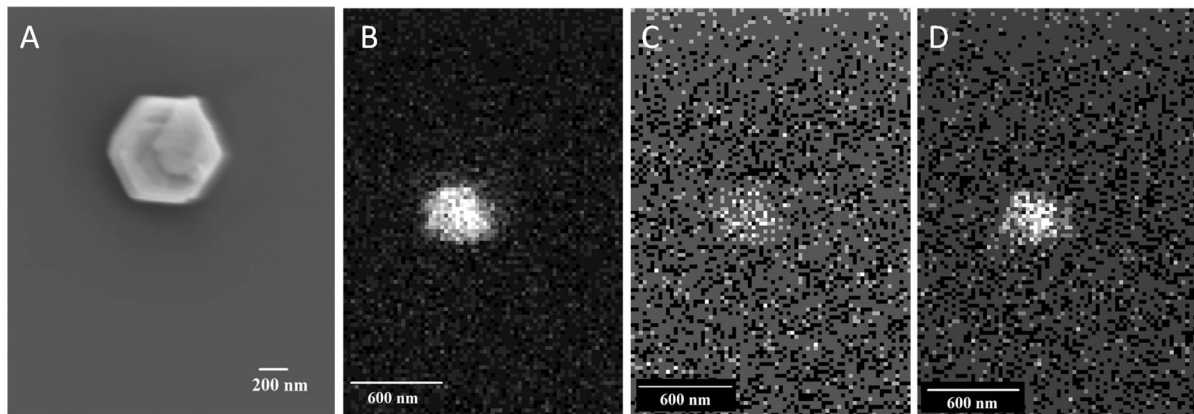

**Fig. S5** (A) Scanning electron microscope (SEM) image of quasi-2D  $\text{Cs}_3\text{Bi}_2\text{I}_9$  nanosheets. (B-D) Panchromatic cathodoluminescence (CL) maps of the nanosheets (B) without filter, (C) with 500/50 nm bandpass filter, and (D) 600/50 nm bandpass filter.

#### Fitting of transient absorption data

For fitting the transient absorption data, the coupled differential equations for the sequential model with three stretched exponentials read as follows:

$$\begin{aligned}
 \frac{dn_1}{dt} &= -\frac{n_1}{2\sqrt{t \cdot \tau_1}} & n_1(0) &= 1 \\
 \frac{dn_2}{dt} &= +\frac{n_1}{2\sqrt{t \cdot \tau_1}} - \frac{n_2}{2\sqrt{t \cdot \tau_2}} & n_2(0) &= 0 \\
 \frac{dn_3}{dt} &= +\frac{n_2}{2\sqrt{t \cdot \tau_2}} - \frac{n_3}{2\sqrt{t \cdot \tau_3}} & n_3(0) &= 0
 \end{aligned}$$

The population of the species  $n_1$ ,  $n_2$ , and  $n_3$  decayed sequentially starting with the complete population in  $n_1$ . The time constants  $\tau$  are freely fitted parameters. The data is fitted globally with the equation:

$$TA(\lambda, t) = EAS_1(\lambda) \cdot n_1(t) + EAS_2(\lambda) \cdot n_2(t) + EAS_3(\lambda) \cdot n_3(t)$$

The values of each evolution-associated spectra (EAS) at a certain probe wavelength thus correspond to the amplitudes of the related species, where the time constants are fitted globally.

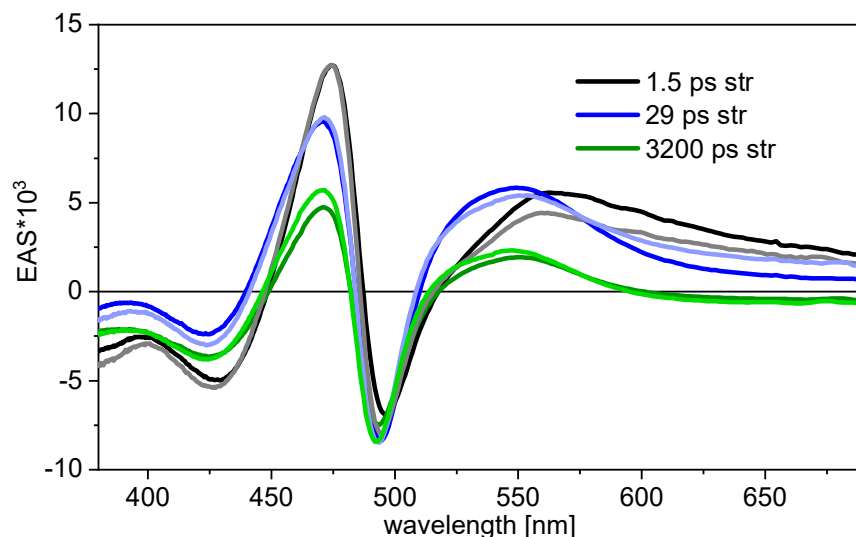

**Fig. S6** EAS obtained from the global fitting of the transient absorption spectra with three stretched exponential decay functions of colloidal quasi-2D  $\text{Cs}_3\text{Bi}_2\text{I}_9$  nanosheet solutions in toluene excited with a photon energy of 2.48 eV and at different excitation intensities. The lines with dark colors show the EAS at 200  $\mu\text{W}$  excitation power and the light-colored curves with 60  $\mu\text{W}$ . The time constants are determined with the 200  $\mu\text{W}$  data and set as constant for 60  $\mu\text{W}$ . The EAS of the 60  $\mu\text{W}$  data is multiplied by 3.33 corresponding to 200 $\mu\text{W}$ /60 $\mu\text{W}$ .

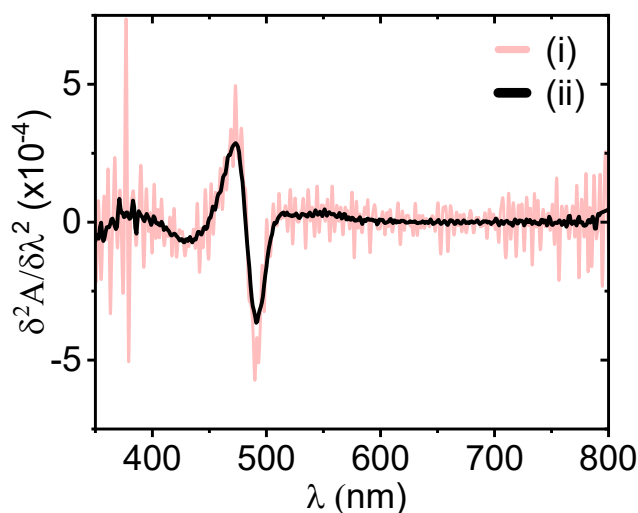

**Fig. S7** Second derivative spectrum of the steady-state absorption spectrum, which is shown in Fig. 4A in the main text. (i) Raw data and (ii) smoothed plot.

## Notes and references

1 F. Bai, Y. Hu, Y. Hu, T. Qiu, X. Miao and S. Zhang, *Sol. Energy Mater. Sol. Cells*, 2018, **184**, 15–21.

- 2 Y. Zhang, Y. Liu, Z. Xu, H. Ye, Z. Yang, J. You, M. Liu, Y. He, M. G. Kanatzidis and S. (Frank) Liu, *Nat. Commun.*, 2020, **11**, 2304.
- 3 K. Momma and F. Izumi, *J. Appl. Crystallogr.*, 2011, **44**, 1272-1276.
